1 **MyROOT: A novel method and software for the semi-automatic measurement of**  
2 **plant root length**

3

4 **Authors: Isabel Betegón-Putze<sup>1,\*</sup>, Alejandro González<sup>2,\*</sup>, Xavier Sevillano<sup>2</sup>, David**  
5 **Blasco-Escámez<sup>1</sup> and Ana I. Caño-Delgado<sup>1, †</sup>**

6

7

8 **Affiliations:**

9 <sup>1</sup>*Department of Molecular Genetics, Center for Research in Agricultural Genomics (CRAG)*  
10 *CSIC-IRTA-UAB-UB, Campus UAB, Bellaterra (Cerdanyola del Vallès), 08193 Barcelona,*  
11 *Spain.*

12 <sup>2</sup>*GTM- Grup de recerca en Tecnologies Mèdia, La Salle, Universitat Ramon Llull, 08022*  
13 *Barcelona, Spain.*

14 \*equal author contribution

15 †Correspondence to: [ana.cano@cragenomica.es](mailto:ana.cano@cragenomica.es)

16 Present address:

17 Dept. Molecular Genetics

18 Centre de Recerca en Agrigenòmica (CRAG) CSIC-IRTA-UAB-UB

19 Campus UAB, Bellaterra (Cerdanyola del Vallés)

20 E-08193 Barcelona, Spain

21 Tel: +34 93 563 66 00 ext. 3210

22 Fax: +34 93 563 66 01

23 <http://canolab.cragenomica.es/>

24

25

26

27

## 28 **ABSTRACT**

29 Root analysis is essential for both academic and agricultural research. Despite the great  
30 advances in root phenotyping and imaging however, calculating root length is still  
31 performed manually and involves considerable amounts of labor and time. To overcome  
32 these limitations, we have developed MyROOT, a novel software for the semi-automatic  
33 quantification of root growth of seedlings growing directly in agar plates. Our method  
34 automatically determines the scale from the image of the plate, and subsequently  
35 measures the root length of the individual plants. To this aim, MyROOT combines a  
36 bottom-up root tracking approach with a hypocotyl detection algorithm. At the same time  
37 as providing accurate root measurements, MyROOT also significantly minimizes the user  
38 intervention required during the process. Using *Arabidopsis*, we tested MyROOT with  
39 seedlings from different growth stages. Upon comparing the data obtained using this  
40 software with that of manual root measurements, we found that there are no significant  
41 differences (t-test, p-value < 0.05). Thus, MyROOT will be of great aid to the plant  
42 science community by permitting high-throughput root length measurements while  
43 saving on both labor and time.

44

## 45 **INTRODUCTION**

46 The root, which is responsible for anchoring the plant to the soil, is an essential organ for  
47 overall plant growth and development. The characterization of different root traits is  
48 therefore important not only for understanding organ growth, but also for evaluating the  
49 impact of roots in agriculture <sup>1</sup>. As such, generating tools for precise, high-throughput  
50 phenotyping and imaging of the root is essential for plant research and agriculture. Even  
51 phenotyping facilities such as the ones available in the European Plant Phenotypic  
52 Network (<http://www.plant-phenotyping-network.eu/>) have started to implement tools for  
53 the massive screening of roots.

54 Roots provide the necessary structural and functional support for the incorporation of  
55 nutrients and water from the soil. In *Arabidopsis thaliana* (*Arabidopsis*), the primary root  
56 has a very simplified anatomy that makes it very amenable for genetic and microscopic  
57 analyses <sup>2-4</sup>. Different root cell lineages are derived from the activity of a group of stem  
58 cells located at the root apex. Here, the stem cell niche is formed by a few (3-7) quiescent  
59 center (QC) cells that occasionally divide asymmetrically to renew themselves and to

60 form daughter stem cells. From the root apex, these cells actively divide in the  
61 meristematic zone, and before exiting the cell cycle in the transition zone, continue to  
62 elongate and differentiate in spatially separated regions of the root. In this way, primary  
63 root growth is determined by the balance between cell division and cell elongation within  
64 the different zones of the root<sup>5-8</sup>.

65 The most straightforward symptom of abnormal root growth or development can be  
66 identified by examining the length of the primary root in seedlings. Abnormalities in  
67 length can usually be observed and measured just five to six days after germination  
68 (DAG), where still reflect their embryonic origin<sup>9</sup>. Growth defects in the primary root of  
69 seedlings are not only consistent with overall growth defects, but also persistent along the  
70 entire plant life cycle<sup>10-12</sup>. Indeed, Arabidopsis root analyses were the foundations for  
71 multiple genetic screens that ultimately led to the identification of several key regulators  
72 of plant growth and development<sup>10,13-16</sup>.

73 Root analysis of young seedlings offers direct information regarding overall plant growth  
74 and viability. Despite important advances in plant imaging techniques such as  
75 microscopic visualization<sup>17-19</sup>, the root length of seedlings growing in agar plates is  
76 generally measured by manually indicating the position of each seedling or manually  
77 tracking each root using the ImageJ software (<https://imagej.nih.gov/ij/>). For this reason,  
78 the development and use of methods that enable the automatic analysis of a large number  
79 of roots represents a step forward for high-throughput root analysis. Automatic analysis  
80 of root system architecture is just beginning to be implemented, and novel methods based  
81 on acquiring, processing, and obtaining quantitative data from root images are now  
82 available (for a review, see<sup>19</sup>).

83 With this in mind, our rational was to develop MyROOT, a software capable of semi-  
84 automatically calculating root length. By precisely detecting all individual roots and  
85 hypocotyls growing on an agar plate from a JPEG image, this software simplifies and  
86 minimizes user intervention during the calculation of root length. As a proof of concept,  
87 MyROOT software was first used for root length measurement of wild type and  
88 brassinosteroid-signaling Arabidopsis mutants grown in control and osmotic stress  
89 conditions. MyROOT software is available at [https://www.cragenomica.es/research-](https://www.cragenomica.es/research-groups/brassinosteroid-signaling-in-plant-development)  
90 [groups/brassinosteroid-signaling-in-plant-development](https://www.cragenomica.es/research-groups/brassinosteroid-signaling-in-plant-development).

91 Currently, a myriad of software is available for measuring root phenotypic traits. These  
92 differ with respect to: i) the medium in which the plant is grown, ii) the use of 2D or 3D  
93 imaging, iii) the imaging modality, and iv) the degree of manual intervention required  
94 from the user <sup>1</sup>. Specifically, when using these available software tools to measure root  
95 length, plant scientists face three main hurdles: i) the constraints imposed during the  
96 image acquisition process, ii) the ease of use (often related to the degree of manual  
97 intervention required), and iii) the accuracy of the root length measurements.

98 Regarding the complexity of the image acquisition process, software tools such as  
99 PlaRoM <sup>20</sup> require scanning the plates using a camera-microscope unit mounted on a  
100 robotic arm, BRAT <sup>21</sup> requires a cluster of several flatbed scanners, and the  
101 RootReader2D software <sup>22</sup> requires a camera equipped with two cross-polarized filters.  
102 In comparison, MyROOT operates on photographs (of Petri dishes) taken directly from  
103 above with a standard digital camera or even a good quality cell phone.

104 In terms of manual intervention, some of the software tools require intensive user  
105 participation in order to define certain aspects of the individual roots under analysis. This  
106 makes measuring root length a time-consuming and burdensome process. A prime  
107 example of this is RootTrace <sup>23</sup>, a software for which the user has to manually define the  
108 start point of each root. In contrast, MyROOT merely requires the user to define the region  
109 in which the seedlings are placed on the plate, and then subsequently operates in a fully  
110 automatic fashion. Moreover, the interactive interface of MyROOT permits the  
111 visualization of results from each intermediate step of the root measurement process. In  
112 this way, the user can modify any configuration parameter at will, and redo any of the  
113 steps if deemed necessary.

114 Finally, as far as measurement accuracy is concerned, the precise detection of root start  
115 and end points is critical. While some software tools rely on intensive manual labor for  
116 defining the aforementioned points <sup>24</sup>, others such as BRAT <sup>21</sup> use shoot detection to  
117 determine the root start point. In contrast, to ensure that roots are measured correctly from  
118 their tip to their true start point, MyROOT combines a bottom-up root tracking approach  
119 with a hypocotyl detection algorithm to provide accurate measurements.

120 In summary, not only is MyROOT very straightforward to use, but it can also accurately  
121 measure root length on a plate while sparing important and unnecessary human labor.

122

## 123 **RESULTS**

### 124 **MyROOT is a software for the high-throughput analysis of root length**

125 The majority of root studies begin with an overall determination of root growth as  
126 estimated by manual, laborious and time-consuming measurements. To address this  
127 limitation, we developed a semi-automatic and non-invasive software for the high-  
128 throughput measurement of root length. This method is implemented in Matlab as an  
129 automatic tool named MyROOT (Fig. 1a). It is based on pictures of whole agar plates  
130 where young seedlings are growing vertically on the surface, and implements novel  
131 algorithms capable of separately detecting the root and the hypocotyl of each individual  
132 seedling and estimating a hypocotyl curve based on the detection of some hypocotyls  
133 (Fig. 1b-g).

134 MyROOT detects and measures root length by following a series of steps (Fig. 1b-g).  
135 First, a digital image of the plate containing the growing seedlings is taken and used for  
136 the analysis (Fig. 1b and Fig. S1). The image is taken with a ruler (at least 1 cm long)  
137 placed on top of the plate. From each JPEG image, the software: i) detects 1 cm of the  
138 ruler to automatically compute the scale and calculate the equivalence between pixels and  
139 millimeters (mm; Fig. 1c); ii) generates a binary mask from the manually selected area  
140 that allows for root segmentation (this separates those pixels that belong to a root from  
141 those of the background) (Fig. 1d); iii) measures the length of the roots through a root  
142 tracking process (Fig. 1e); iv) computes a regression curve based on the detection of the  
143 hypocotyls to identify the starting point of each root (Fig. 1f); v) measures the root length  
144 again from the root tip to the end of the hypocotyl (Fig. 1g); and vi) exports the  
145 measurements and the generated masks to a new folder. Finally, the results are saved in:  
146 i) an Excel spreadsheet or a TXT file in which each root is identified by an ID tag, length  
147 value and a descriptive text label introduced by the user; ii) an image showing the detected  
148 and measured roots; and iii) MATLAB variables including the intermediate data such as  
149 hypocotyl position and the detection curve that were generated while quantifying root  
150 length.

151 One of the advantages of this software is that it allows the user to supervise the different  
152 steps of the process as the results of each step are displayed before executing the following  
153 one. This feature enables the user to modify the different parameters (e.g., segmentation  
154 thresholds for ruler and root detection, and model for hypocotyl detection, etc.) at any

155 point in the process to take into account different image conditions. Nonetheless, default  
156 parameter values have been set for satisfactory operation on a wide range of images for  
157 pre-defined acquisition conditions (see Material and Methods). Furthermore, the position  
158 of any hypocotyl that is not automatically detected can be manually indicated, and  
159 undesired roots can be manually removed from the results before saving.

160 In summary, by determining the pixel-millimeter equivalence and detecting seedling  
161 morphology (roots and hypocotyls) from an image of a seedling-containing agar plate,  
162 MyROOT offers a valuable analytical tool for precisely measuring root growth in a semi-  
163 automatic manner. As such, this software clearly provides a solution to the timely task of  
164 manually quantifying root length.

### 165 **Root detection and measurement process**

166 MyROOT has been developed for the high-throughput, accurate, and non-invasive  
167 measurement of root length from seedlings growing in agar plates. In this respect, the  
168 three most crucial steps are to precisely determine the scale, identify the roots, and  
169 measure their length. The scale information is obtained from a piece of measuring tape  
170 that is placed on the surface of the Petri dish. This allows the measurements to be  
171 completely independent from the specific characteristics of the image capture system.  
172 The first step for detecting the ruler is based on its color contrast with the background.  
173 By computing the vertical and horizontal profiles of the image, the algorithm is designed  
174 to explore the entire image in search of a white patch (Fig. 2a). As the border of the plate  
175 has a similar color contrast with the background, a median filter is applied to reduce the  
176 border effect. The maximum values in the filtered profiles define the image area where  
177 the white patch is present. Next, the resulting area is further cropped (Fig. 2b) and  
178 processed (Fig. 2c-e). By applying a threshold based on Otsu's algorithm <sup>25</sup>, the black  
179 lines representing cm and mm marks are not filtered out (Fig. 2b). Finally, a horizontal  
180 profile of this binary image is generated (Fig. 2d) in which the pixel-mm equivalence is  
181 defined as the difference between consecutive local maxima (Fig. 2e).

182 The core of the whole method is the root extraction and measurement process. In order to  
183 extract roots, the user must first manually define the area in which roots are present (note:  
184 only one row of seedlings should be included when defining the area). Then, with just a  
185 few mouse clicks from the user, a binary mask is generated that allows root segmentation.  
186 This later leads to the identification of individual roots through a root tracking process,

187 and finally allows the individually identified roots to be measured (Fig. 3). The root  
188 segmentation process can be divided into four main steps: i) color normalization (Fig.  
189 3a), ii) ridge detection (Fig. 3b), iii) root tracking (Fig. 3c), and iv) root identification  
190 (Fig. 3d). During the color normalization step, the image is processed and a global  
191 working framework is set (i.e., all images going through this process become color-  
192 balanced and have the same lower and higher white values; Fig. 3a). This allows the user  
193 to manage different initial conditions (illumination, color, and saturation, etc.) while  
194 continuing with the same subsequent steps of the pipeline. In the next step, a ridge (i.e.,  
195 white contrasted area) detector identifies roots based on their contrast with the  
196 background (for this, the level of whiteness is irrelevant; Fig. 3b). After the detection step,  
197 a final mask is generated for tracking the roots. Due to the linear disposition of the roots  
198 in the plate, we employed a bottom-up tracking approach. As such, tracking starts at the  
199 end point of each root and continues upward, row by row, until the hypocotyl detection  
200 curve is found (Fig. 3c). Finally, the tracking of each root makes it possible to identify  
201 which pixels correspond to which root (Fig. 3d).

202 Once the root tracking process has been completed, each individual root is measured  
203 based on previous positions saved in the historical record. Specifically, root length is  
204 calculated in pixels by adding the distances between previous consecutive points and then  
205 applying the previously calculated pixel-mm equivalence. Next, a refinement process is  
206 applied in which very short roots, which are often associated with noise, are discarded.  
207 By default, MyROOT discards any root measurement shorter than 30% of the longest  
208 one. However, this percentage can be manually chosen by the user if need be. A second  
209 filter is then applied in order to keep those roots that terminate close to the previously  
210 calculated hypocotyl curve. If a root surpasses the hypocotyl curve, it is cut at this level.  
211 Finally, a unique numeric identifier (ID) is assigned to all roots that are not filtered out  
212 during processing.

213 As two roots can be located so close to one another that they cannot be detected as  
214 individual roots, we trained MyROOT with the following characteristics: i) when a split  
215 occurs and a current root matches more than one detection (blue circle in Fig. 3C), a new  
216 root sharing the same historical record is created, and ii) when a fusion occurs and two  
217 roots match a single detection (yellow circle in Fig. 3c), the shortest root is eliminated  
218 from the root set and added as a sub-root of the longest one.

219 To validate our software, we compared root length measurements obtained using  
220 MyROOT with manual measurements performed using ImageJ. As a first comparison,  
221 six-day-old seedlings grown in three different vertical Petri dishes (n=89) were measured  
222 by three different scientists (Fig. 4a). Upon comparing these MyROOT and ImageJ  
223 measurements, we observed no significant difference (t-test, p-value < 0.05) in the mean  
224 root lengths (23.45, 23.61 and 23.62 mm using ImageJ, and 23.47, 23.51 and 23.35 mm  
225 using MyROOT). Taken together, these results indicate that measurements made using  
226 our software coincide with manual measurements, thereby supporting the use of  
227 MyROOT for root length analysis. Furthermore, a second comparison was conducted by  
228 measuring the root length of the same seedlings during six consecutive days (from three  
229 to eight DAG; n>116; Fig. 4b). Again, highly similar values were obtained between the  
230 MyROOT and manual measurements. Importantly, this validates MyROOT for analyzing  
231 the root length of Arabidopsis seedlings at different days after germination.

232 In addition, we also evaluated the time required by MyROOT to determine root lengths,  
233 and compared it to the time needed for manual measurements. Importantly, we found that  
234 our software significantly reduces the necessary time. MyROOT reduces the time  
235 required to measure one plate by approximately half (Fig. S2).

### 236 **Hypocotyl detection**

237 One of the main advantages of MyROOT is its ability to identify the hypocotyls of the  
238 growing seedlings. This characteristic is important for accurately determining the start  
239 point of each root. The hypocotyl detection process is based on visual features extracted  
240 (appearance and color) from the image. These features were used to generate a hypocotyl  
241 model by introducing 1,259 hypocotyls of seedlings of different ages and characteristics  
242 and 7,915 samples with background information (see Material and Methods). The learned  
243 model is able to determine whether a given sample is a hypocotyl or not. To extract visual  
244 features, we implemented the histogram of oriented gradient (HOG) <sup>26</sup> method. The HOG  
245 method is based on the orientation of the contours in the image, and generates a histogram  
246 that represents the appearance/shape of the sample. For extracting color features, color  
247 distribution histograms representing the amount of color in a given sample area are used  
248 (Fig. 5a). To train the model, we implemented a linear support vector machine classifier  
249 that uses appearance and color features from the hypocotyl images. This classifier  
250 generates the best hyperplane that classifies samples as positive (hypocotyls) and negative



251 (no hypocotyls) examples. During the hypocotyl detection stage, the sliding window  
252 approach <sup>27</sup> is used to perform an exhaustive search for hypocotyls. Finally, by keeping  
253 the highest scored windows as true positives, polynomial regression is used to define a  
254 curve that passes through all the detected hypocotyls. Although the user can manually  
255 insert the location of the hypocotyls, this curve enables the position of undetected  
256 hypocotyls to be estimated, and thus corrects the curve tracing. The intersection between  
257 the hypocotyl detection curve and each root is used to define the root start point.

258 We first evaluated our hypocotyl detection process in terms of different hypocotyl  
259 detection models. Both the precision-recall curve (Fig. 5b) and the number of false  
260 positives per image (FPPI; Fig. 5c) were calculated for three different models that differ  
261 in the type of feature they use for describing hypocotyls: only color information, only  
262 appearance information (via HOG features), or both types of information (HOG + color).

263 Upon analyzing the precision-recall curve of each model, we found the HOG + color  
264 model to be the most robust (Fig. 5b). In the case of FPPI, the lowest miss rate was also  
265 found when using the HOG + color model (Fig. 5c). These results indicate that when  
266 considering both color and appearance (i.e., the HOG + color model), more hypocotyls  
267 are identified than when using only one of the features. Thus, this validates our MyROOT  
268 method because it incorporates both HOG and color information.

269 Next, we evaluated the influence of different regression curve models on the root  
270 measurement refinement used to set up the limits of individual roots (Fig. 5d). To create  
271 these curves, a regression upon the detected hypocotyls was performed. In order to define  
272 which regression model gives the better fit, we tested different polynomial models that  
273 were evaluated in terms of the average distance (in pixels) between the real hypocotyl  
274 position and the point of intersection between the root and the regression curve (Fig. 5d).  
275 The results indicate that when using a hypocotyl regression curve of order 4, a good  
276 balance between accuracy and flexibility that is able to account for small changes in  
277 hypocotyl position is reached. As such, we chose to employ this regression curve in our  
278 software.

279

280 **DISCUSSION**

281 The advent of root imaging and phenotyping has aided in the understanding not only of  
282 plant organogenesis and development, but also of plant adaptation to changing  
283 environments<sup>19</sup>. Here, we present MyROOT, a novel software for accurately measuring  
284 root length from images of Arabidopsis seedlings that are grown vertically in Petri dishes.  
285 In addition to its simple image acquisition method, this software minimizes user  
286 intervention through the automatic detection of the scale, root tips and hypocotyls.  
287 Compared to other available root software such as WinRhizo<sup>28</sup> or GROWSCREEN-Root  
288<sup>29</sup>, which require specialized imaging equipment such as scanners or infrared light,  
289 MyROOT merely uses a standard digital camera.

290 One of the novel aspects of this software compared with other existing methods such as  
291 ImageJ and RootTrace<sup>23</sup> is that MyROOT has been trained to automatically identify  
292 hypocotyls, the shoot-root junction and the root tip of each seedling. Such automated  
293 identification is necessary for minimizing the manual intervention of the user and as such,  
294 the time dedicated to the root measurement task. In addition, MyROOT is also able to  
295 identify hypocotyls of different sizes and morphologies, an aspect that also makes it  
296 suitable for the phenotypic analysis of mutants or of plants grown in different conditions.  
297 Furthermore, in exceptional cases where the software might be unable to automatically  
298 recognize hypocotyls, they can actually be manually indicated by the user. In this way,  
299 we have designed MyROOT as a versatile tool that can be used in a wide range of  
300 developmental studies, including analyses of seedlings at different developmental stages  
301 and under different conditions.

302 MyROOT is a modularly designed software. It consists of a group of specialized  
303 algorithms able to detect and analyze the measuring tape, detect the roots, track the roots  
304 in a bottom-up fashion, and detect the hypocotyls. Therefore, any improvement to any of  
305 these components, or new algorithms for the determination of other features, can be easily  
306 included in subsequent versions of MyROOT. Examples of future improvements that  
307 could be included are the development of daily growth-monitoring algorithms that permit  
308 the detection of abnormal root growth patterns, the analysis of root system architecture  
309 beyond the primary root, and the identification of hypocotyls from other plant species. In  
310 the future, upgraded versions of our software could consist of a completely automatic  
311 operation connected to high-throughput facilities for massive root phenotyping.

312

## 313 **CONCLUSION**

314 MyROOT is a software capable of semi-automatically measuring the length of the  
315 primary root of *Arabidopsis* seedlings. It automatically recognizes the scale of the image,  
316 and detects the hypocotyls and root tips from young seedlings growing vertically in agar  
317 plates. This information is then used to accurately calculate the root length of each  
318 individual plant. This software was designed in such a way that only a simple image of  
319 the plate is required for analysis. Importantly, MyROOT is even able to recognize  
320 hypocotyls of different ages and morphologies, and can thus be applied in a large range  
321 of experiments.

322 Here, our validation experiments demonstrate the high precision of measurements made  
323 with MyROOT, thereby proving that this software can be used within the research  
324 community to perform high-throughput experiments in a less time-consuming manner.

325

## 326 **MATERIAL AND METHODS**

### 327 **Plant material and growth conditions**

328 Wild type Col-0 *Arabidopsis thaliana* seeds were surface sterilized with a 5-min  
329 incubation in 1.5% sodium hypochlorite, followed by five washes in distilled sterile  
330 water. Seeds were stratified for 48 h at 4°C in the dark to synchronize germination. Seeds  
331 were sown in 12x12-cm plates containing ½ Murashige and Skoog (MS) medium without  
332 sucrose and supplemented with vitamins (0.5MS-). Seeds were distributed individually  
333 in the plate in two rows with around 15 seeds per row. The plates were incubated for 3 to  
334 8 days vertically oriented under long day conditions (16 hours of light and 8 of hours  
335 dark) at 22°C and 60% relative humidity.

### 336 **Plant Imaging and computer settings**

337 Images were taken with a D7000 Nikon camera. The pre-defined image acquisition  
338 conditions consist of placing the camera 50 cm above the plate with an illuminated  
339 support and the following settings: aperture 13, shutter speed 10, ISO 100 and Zoom x35.  
340 The plates were placed face down on a black surface and with a ruler (at least 1 cm long)  
341 horizontally positioned on top (Fig. S1). The images were saved in JPEG format (size  
342 between 2.5 and 2.7 MB per image).

343 MyROOT and ImageJ were run in a Intel® Core™ i7-6700 CPU computer.

#### 344 **Hypocotyl detection model**

345 The software was trained to identify hypocotyls by using 1,259 positive examples  
346 (hypocotyls) and 7,915 background and negative examples (parts of the image that did  
347 not contain hypocotyls). The positive samples correspond to Col-0 wild type, *bri1-116*,  
348 and a transgenic line overexpressing BRI1-GFP, which have morphologically different  
349 hypocotyls as shown in <sup>11</sup>.

#### 350 **Algorithms**

351 MyROOT has been developed in Matlab (version 8.3.0.532. Natick, Massachusetts: The  
352 MathWorks Inc., 2014). It will be made available to the plant sciences community  
353 through the Plant Image Analysis website ([plant-image-analysis.org](http://plant-image-analysis.org); <sup>30</sup>) a standalone  
354 executable application.

355

#### 356 **ACKNOWLEDGMENTS**

357 We would like to thank Caño-Delgado Lab members for helping with the manual root  
358 length measurements and comments on the manuscript. A.I.C-D. is a recipient of a  
359 BIO2016-78955 grants from the Spanish Ministry of Economy and Competitiveness and  
360 a European Research Council, ERC Consolidator Grant (ERC-2015-CoG – 683163). I.B-  
361 P. is funded by the FPU15/02822 grant from the Spanish Ministry of Education, Culture  
362 and Sport. D.B-E. is contracted with the BIO2016-78955 grant in the A.I.C-D laboratory.  
363 CRAG is funded by “Severo Ochoa Programme” from Centers of Excellence in R&D  
364 2016-2019 (SEV-2015-485 0533).

365

#### 366 **AUTHOR CONTRIBUTIONS**

367 A.I.C-D. conceived the idea. A.G. and X.S. developed the algorithms for the method.  
368 A.G., X.S., I.B-P. and D.B-E performed the validation experiments. I.B-P. and D.B-E.  
369 acquired the dataset. X.S. and A.I.C-D. designed and supervised the study. I.B-P., A.G.  
370 X.S. and A.I.C-D. wrote the manuscript.

371

## 372 **FIGURE LEGENDS**

### 373 **Figure 1. The graphical interface and steps of MyROOT.**

374 **(a)** The graphical user interface of MyROOT is organized into six sections: 1. Input image  
375 information, 2. Root extraction parameters, 3. Hypocotyl detection parameters, 4. Manual  
376 removal of roots, 5. Visualization of the image and the different detection steps, and 6.  
377 Saving parameters. **(b)** The input image required for analysis is a picture of the square  
378 plate in which the aligned seedlings are growing. By using information from this image,  
379 MyROOT performs the following steps: **(c)** Identification of the ruler to determine the  
380 scale (i.e., the equivalence between pixels and millimeters), **(d)** Root segmentation to  
381 identify the seedlings, **(e)** Root tracking to measure the roots, **(f)** Hypocotyl detection to  
382 identify the hypocotyls and separate them from the roots, and **(g)** Root measurement to  
383 quantify the length of individual seedlings (i.e., the distance from the root tip to the end  
384 of the hypocotyl).

### 385 **Figure 2. The ruler identification process.**

386 **(a)** MyROOT computes the vertical and horizontal profiles of the image to look for a  
387 white patch. **(b)** The ruler is identified. **(c)** The area corresponding to the ruler is then  
388 segmented into light and dark areas (binarization), for which black lines (dark areas) are  
389 identified with high values and white areas with lower values. **(d)** A profile is generated  
390 in which black lines are identified as peaks. **(e)** By using the distance between peaks, the  
391 equivalence between pixels and millimeters is calculated.

### 392 **Figure 3. Root extraction method.**

393 **(a)** Colors are normalized in the area where roots are present, and white roots are detected.  
394 **(b)** Segmentation is performed by applying a ridge detector. **(c)** Starting at the root tip,  
395 the roots are tracked using a bottom-up approach. **(d)** Each root is measured using its  
396 historical recorded tracking, and root length is calculated by taking into account the pixel-  
397 millimeter equivalence.

### 398 **Figure 4. Validation of root length measurements.**

399 **(a)** Root length of 6-day-old Arabidopsis seedlings (3 plates, n=89). Measurements were  
400 performed by three different people using either the ImageJ tool or MyROOT. **(b)** Root  
401 length of Arabidopsis seedlings over 6 days (from 3 DAG to 8 DAG, n>116).  
402 Measurements were performed using either ImageJ or MyROOT. Error bars indicate the

403 standard error. Seedlings that were not measured by MyROOT in at least 4 time points  
404 were discarded.

405 **Figure 5. Hypocotyl detection method and validation.**

406 **(a)** Scheme of the hypocotyl detection method. A candidate window is defined as a square  
407 area inside the image. In order to describe a candidate, appearance/shape (HOG) and color  
408 information are extracted. Appearance information is extracted to calculate the gradient  
409 of the image (i.e., the direction of the contours within the image at each pixel). Histograms  
410 of Oriented Gradient (HOG) and the histograms of color are calculated over regular  
411 spaced, non-overlapping cells inside the candidate window (forming the block  
412 descriptor). Finally, all color/HOG cell histograms are concatenated to obtain the  
413 candidate window description. **(b)** Precision-Recall curve for three different models of  
414 hypocotyl detection (HOG, Color and HOG+Color). The curve is obtained by changing  
415 the threshold that defines the frontier between positive and negative samples. For each  
416 threshold, the precision (well classified ratio) and the recall (poor classified ratio) were  
417 calculated. The area under the curve represents the robustness of the classifier, with a  
418 higher value indicating greater robustness (a higher well classified ratio to poor classified  
419 ratio over the entire range of the classifier). **(c)** False Positives Per Image (FPPI) curve  
420 for three different models of hypocotyl detection (HOG, Color and HOG+Color). The  
421 curve plots the miss rate against the FPPI. In this way, the average miss rate over a specific  
422 FPPI range (1 to 10) represents the sensitivity of the classifier to not miss good samples  
423 and keep the false positive ratio low. **(d)** The average distance in pixels between the real  
424 hypocotyl position and the point of intersection between the root and the polynomial  
425 regression curves, for polynomial regression curves of orders 1 to 6 and an extra model  
426 including a sine component. Error bars indicate the standard error.

427 **Supplementary Figure 1.** Laboratory setup for taking pictures of the plates. The image  
428 shows the position of the lights, the camera and the plate to be analyzed, all positioned  
429 over a black surface.

430 **Supplementary Figure 2.** Evaluation of the time required to measure root length. Time  
431 (in seconds) required for three different scientists to measure the root length of two  
432 different plates containing one and two rows of seedlings respectively. The measurements  
433 were done with MyROOT and ImageJ. Error bars indicate the standard error.

434 **BOX 1: Installation guide for MyROOT software.**

435 **BOX 2: Brief user guide for MyROOT software.**

436

437 **REFERENCES**

- 438 1 Kuijken, R. C., van Eeuwijk, F. A., Marcelis, L. F. & Bouwmeester, H. J. Root phenotyping:  
439 from component trait in the lab to breeding. *Journal of experimental botany* **66**, 5389-  
440 5401, doi:10.1093/jxb/erv239 (2015).
- 441 2 Dolan, L. *et al.* Cellular organisation of the Arabidopsis thaliana root. *Development* **119**,  
442 71-84 (1993).
- 443 3 Ishikawa, H. & Evans, M. L. Specialized zones of development in roots. *Plant physiology*  
444 **109**, 725-727 (1995).
- 445 4 Iyer-Pascuzzi, A., Simpson, J., Herrera-Estrella, L. & Benfey, P. N. Functional genomics of  
446 root growth and development in Arabidopsis. *Current opinion in plant biology* **12**, 165-  
447 171, doi:10.1016/j.pbi.2008.11.002 (2009).
- 448 5 Beemster, G. T. & Baskin, T. I. Analysis of cell division and elongation underlying the  
449 developmental acceleration of root growth in Arabidopsis thaliana. *Plant physiology*  
450 **116**, 1515-1526 (1998).
- 451 6 Verbelen, J. P., De Cnodder, T., Le, J., Vissenberg, K. & Baluska, F. The Root Apex of  
452 Arabidopsis thaliana Consists of Four Distinct Zones of Growth Activities: Meristematic  
453 Zone, Transition Zone, Fast Elongation Zone and Growth Terminating Zone. *Plant*  
454 *signaling & behavior* **1**, 296-304 (2006).
- 455 7 Takatsuka, H. & Umeda, M. Hormonal control of cell division and elongation along  
456 differentiation trajectories in roots. *Journal of experimental botany* **65**, 2633-2643,  
457 doi:10.1093/jxb/ert485 (2014).
- 458 8 van den Berg, C., Willemsen, V., Hendriks, G., Weisbeek, P. & Scheres, B. Short-range  
459 control of cell differentiation in the Arabidopsis root meristem. *Nature* **390**, 287-289,  
460 doi:10.1038/36856 (1997).
- 461 9 Jürgens, G., Mayer, U., Busch, M., Lukowitz, W. & Laux, T. Pattern formation in the  
462 Arabidopsis embryo: a genetic perspective. *Philosophical transactions of the Royal*  
463 *Society of London. Series B, Biological sciences* **350**, 7, doi:10.1098/rstb.1995.0132  
464 (1995).
- 465 10 Benfey, P. N. *et al.* Root development in Arabidopsis: four mutants with dramatically  
466 altered root morphogenesis. *Development* **119**, 57-70 (1993).
- 467 11 Gonzalez-Garcia, M. P. *et al.* Brassinosteroids control meristem size by promoting cell  
468 cycle progression in Arabidopsis roots. *Development* **138**, 849-859,  
469 doi:10.1242/dev.057331 (2011).
- 470 12 Potuschak, T. *et al.* EIN3-dependent regulation of plant ethylene hormone signaling by  
471 two arabidopsis F box proteins: EBF1 and EBF2. *Cell* **115**, 679-689 (2003).
- 472 13 Hauser, M. T., Morikami, A. & Benfey, P. N. Conditional root expansion mutants of  
473 Arabidopsis. *Development* **121**, 1237-1252 (1995).
- 474 14 Cano-Delgado, A. I., Metzclaff, K. & Bevan, M. W. The eli1 mutation reveals a link between  
475 cell expansion and secondary cell wall formation in Arabidopsis thaliana. *Development*  
476 **127**, 3395-3405 (2000).
- 477 15 Mouchel, C. F., Briggs, G. C. & Hardtke, C. S. Natural genetic variation in Arabidopsis  
478 identifies BREVIS RADIX, a novel regulator of cell proliferation and elongation in the root.  
479 *Genes & development* **18**, 700-714, doi:10.1101/gad.1187704 (2004).
- 480 16 Ubeda-Tomas, S. *et al.* Root growth in Arabidopsis requires gibberellin/DELLA signalling  
481 in the endodermis. *Nature cell biology* **10**, 625-628, doi:10.1038/ncb1726 (2008).

- 482 17 Gonzalez-Garcia, M. P. *et al.* Single-cell telomere-length quantification couples telomere  
483 length to meristem activity and stem cell development in Arabidopsis. *Cell reports* **11**,  
484 977-989, doi:10.1016/j.celrep.2015.04.013 (2015).
- 485 18 Pfister, A. *et al.* A receptor-like kinase mutant with absent endodermal diffusion barrier  
486 displays selective nutrient homeostasis defects. *eLife* **3**, e03115,  
487 doi:10.7554/eLife.03115 (2014).
- 488 19 Lobet, G. Image Analysis in Plant Sciences: Publish Then Perish. *Trends in plant science*  
489 **22**, 559-566, doi:10.1016/j.tplants.2017.05.002 (2017).
- 490 20 Yazdanbakhsh, N. & Fisahn, J. High-throughput phenotyping of root growth dynamics.  
491 *Methods Mol Biol* **918**, 21-40, doi:10.1007/978-1-61779-995-2\_3 (2012).
- 492 21 Slovak, R. *et al.* A Scalable Open-Source Pipeline for Large-Scale Root Phenotyping of  
493 Arabidopsis. *The Plant cell* **26**, 2390-2403, doi:10.1105/tpc.114.124032 (2014).
- 494 22 Clark, R. T. *et al.* High-throughput two-dimensional root system phenotyping platform  
495 facilitates genetic analysis of root growth and development. *Plant, cell & environment*  
496 **36**, 454-466, doi:10.1111/j.1365-3040.2012.02587.x (2013).
- 497 23 French, A., Ubeda-Tomas, S., Holman, T. J., Bennett, M. J. & Pridmore, T. High-  
498 throughput quantification of root growth using a novel image-analysis tool. *Plant*  
499 *physiology* **150**, 1784-1795, doi:10.1104/pp.109.140558 (2009).
- 500 24 Remmler, L., Clairmont, L., Rolland-Lagan, A. G. & Guinel, F. C. Standardized mapping of  
501 nodulation patterns in legume roots. *The New phytologist* **202**, 1083-1094,  
502 doi:10.1111/nph.12712 (2014).
- 503 25 Otsu, N. A Threshold Selection Method from Gray-Level Histograms. *IEEE Transactions*  
504 *on Systems, Man, and Cybernetics* **9**, 5, doi:10.1109/tsmc.1979.4310076 (1979).
- 505 26 Dalal, N. & Triggs, B. Histograms of Oriented Gradients for Human Detection. *Computer*  
506 *Society Conference on Computer Vision and Pattern Recognition* **1**, 8,  
507 doi:10.1109/CVPR.2005.177 (2005).
- 508 27 Glumov. Detection of objects on the image using a sliding window mode. *Optics & Laser*  
509 *Technology* **27**, 9 (1995).
- 510 28 Arsenault, J., Poulcur, S., Messier, C. & Guay, R. Winrhizo: A root measuring system with  
511 a unique overlap correction method. *HortScience* **30** (1995).
- 512 29 Nagel, K. *et al.* Temperature responses of roots: impact on growth, root system  
513 architecture and implications for phenotyping. *Functional Plant Biology* **36**, 12 (2009).
- 514 30 Lobet, G., Draye, X. & Perilleux, C. An online database for plant image analysis software  
515 tools. *Plant methods* **9**, 38, doi:10.1186/1746-4811-9-38 (2013).

516

517



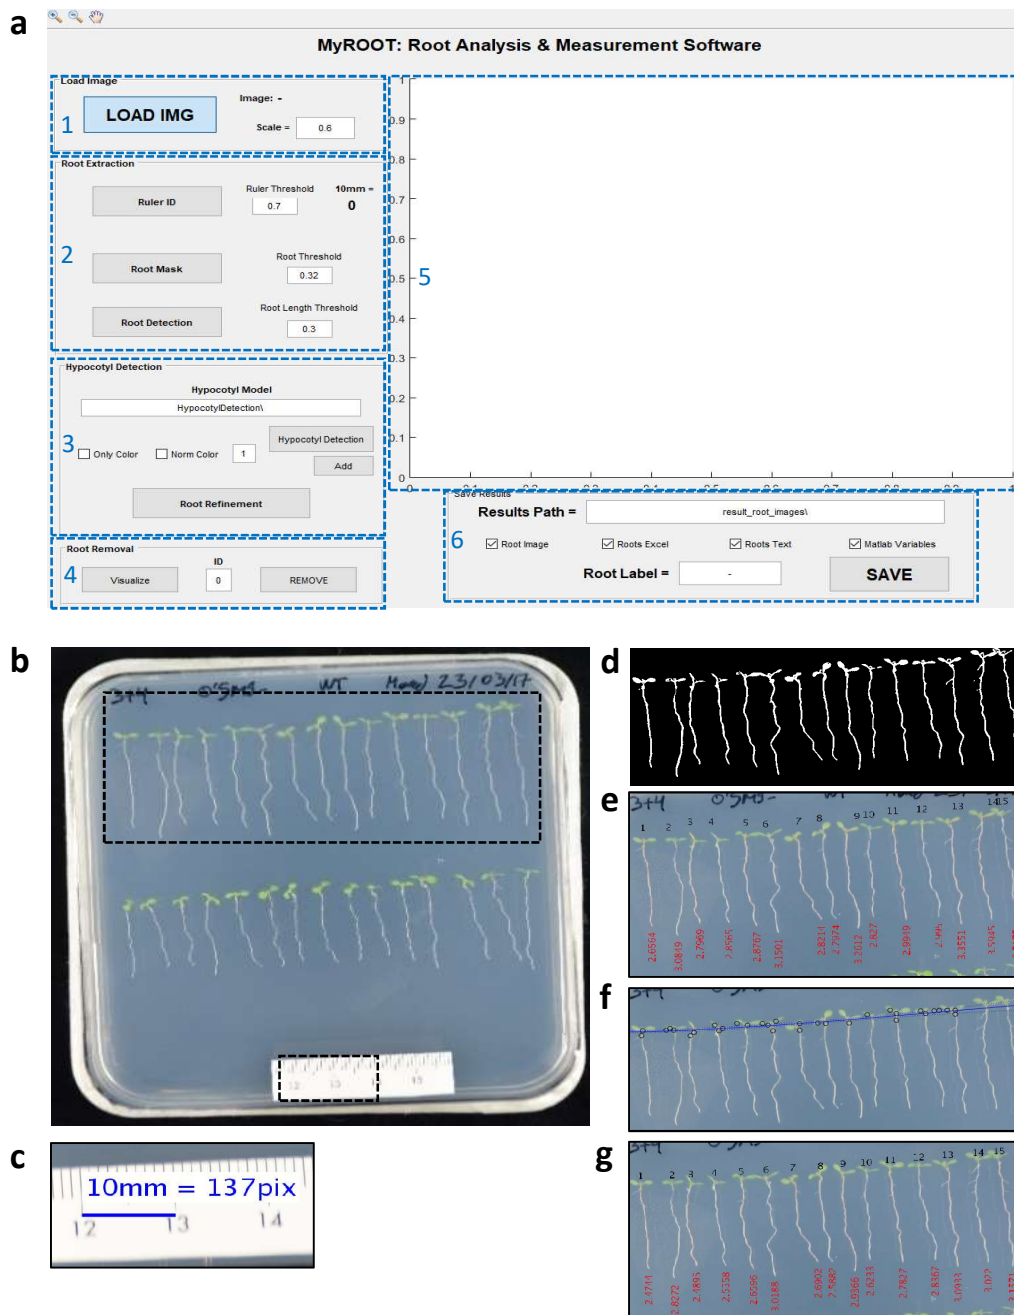

**Figure 1. The graphical interface and steps of MyROOT.**

(a) The graphical user interface of MyROOT is organized into six sections: 1. Input image information, 2. Root extraction parameters, 3. Hypocotyl detection parameters, 4. Manual removal of roots, 5. Visualization of the image and the different detection steps, and 6. Saving parameters. (b) The input image required for analysis is a picture of the square plate in which the aligned seedlings are growing. By using information from this image, MyROOT performs the following steps: (c) Identification of the ruler to determine the scale (i.e., the equivalence between pixels and millimeters), (d) Root segmentation to identify the seedlings, (e) Root tracking to measure the roots, (f) Hypocotyl detection to identify the hypocotyls and separate them from the roots, and (g) Root measurement to quantify the length of individual seedlings (i.e., the distance from the root tip to the end of the hypocotyl).

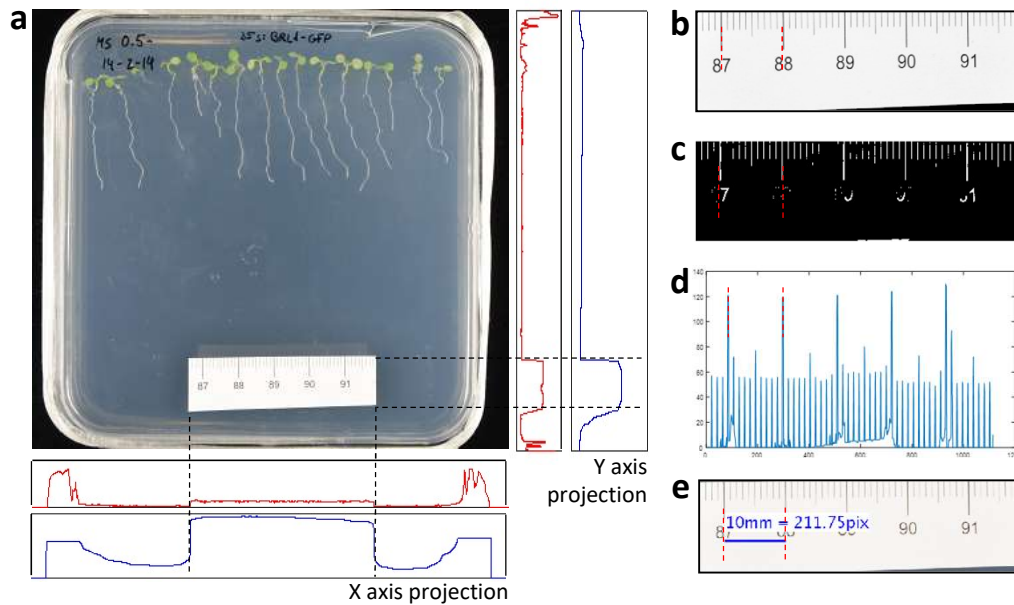

**Figure 2. The ruler identification process.**

(a) MyROOT computes the vertical and horizontal profiles of the image to look for a white patch. (b) The ruler is identified. (c) The area corresponding to the ruler is then segmented into light and dark areas (binarization), for which black lines (dark areas) are identified with high values and white areas with lower values. (d) A profile is generated in which black lines are identified as peaks. (e) By using the distance between peaks, the equivalence between pixels and millimeters is calculated.

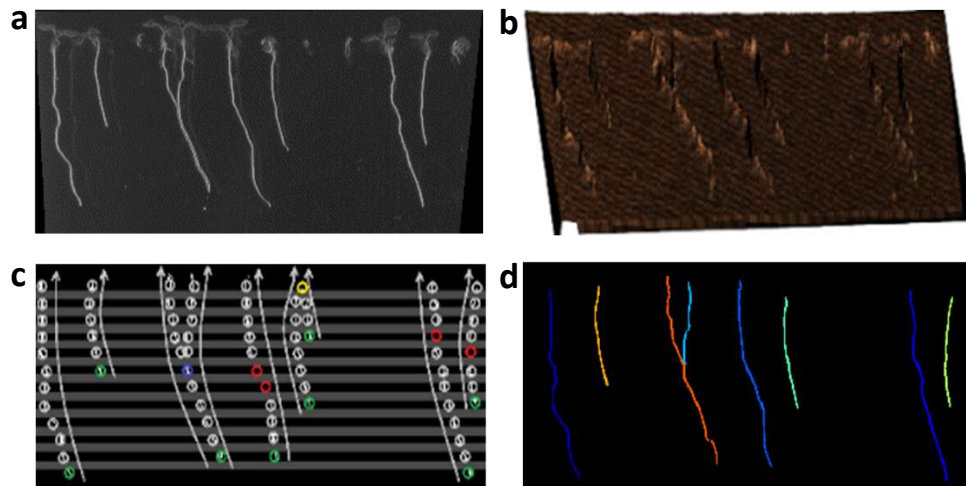

**Figure 3. Root extraction method.**

(a) Colors are normalized in the area where roots are present, and white roots are detected. (b) Segmentation is performed by applying a ridge detector. (c) Starting at the root tip, the roots are tracked using a bottom-up approach. (d) Each root is measured using its historical recorded tracking, and root length is calculated by taking into account the pixel-millimeter equivalence.

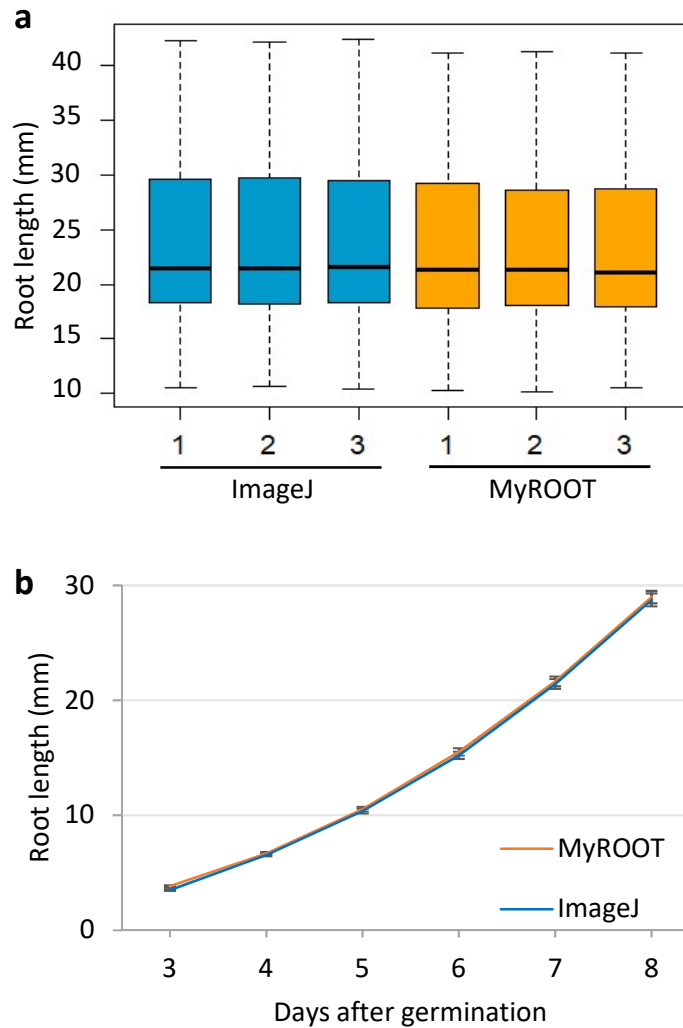

**Figure 4. Validation of root length measurements.**

**(a)** Root length of 6-day-old Arabidopsis seedlings (3 plates, n=89). Measurements were performed by three different people using either the ImageJ tool or MyROOT. **(b)** Root length of Arabidopsis seedlings over 6 days (from 3 DAG to 8 DAG, n>116). Measurements were performed using either ImageJ or MyROOT. Error bars indicate the standard error. Seedlings that were not measured by MyROOT in at least 4 time points were discarded.

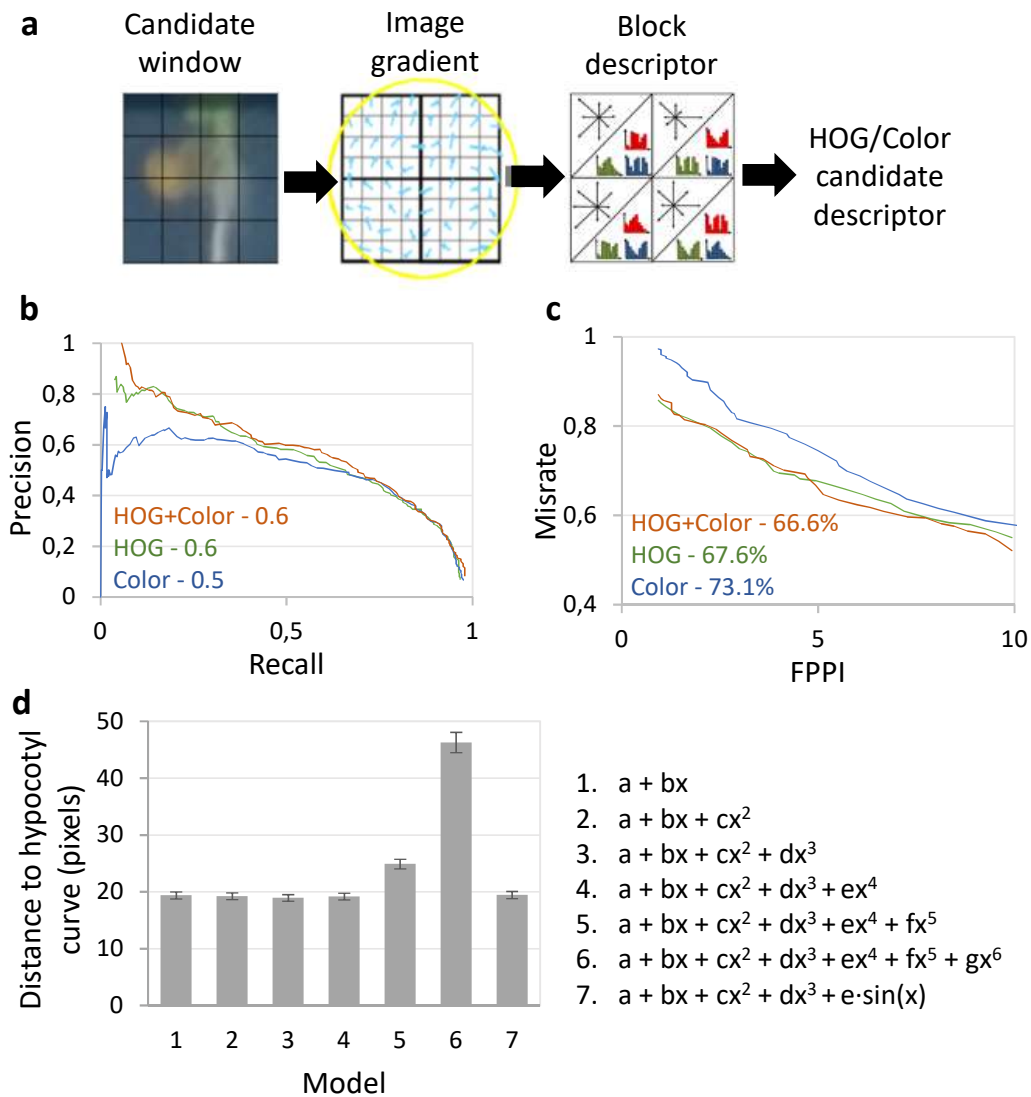

**Figure 5. Hypocotyl detection method and validation.**

**(a)** Scheme of the hypocotyl detection method. A candidate window is defined as a square area inside the image. In order to describe a candidate, appearance/shape (HOG) and color information are extracted. Appearance information is extracted to calculate the gradient of the image (i.e., the direction of the contours within the image at each pixel). Histograms of Oriented Gradient (HOG) and the histograms of color are calculated over regular spaced, non-overlapping cells inside the candidate window (forming the block descriptor). Finally, all color/HOG cell histograms are concatenated to obtain the candidate window description. **(b)** Precision-Recall curve for three different models of hypocotyl detection (HOG, Color and HOG+Color). The curve is obtained by changing the threshold that defines the frontier between positive and negative samples. For each threshold, the precision (well classified ratio) and the recall (poor classified ratio) were calculated. The area under the curve represents the robustness of the classifier, with a higher value indicating greater robustness (a higher well classified ratio to poor classified ratio over the entire range of the classifier). **(c)** False Positives Per Image (FPPI) curve for three different models of hypocotyl detection (HOG, Color and HOG+Color). The curve plots the miss rate against the FPPI. In this way, the average miss rate over a specific FPPI range (1 to 10) represents the sensitivity of the classifier to not miss good samples and keep the false positive ratio low. **(d)** The average distance in pixels between the real hypocotyl position and the point of intersection between the root and the polynomial regression curves, for polynomial regression curves of orders 1 to 6 and an extra model including a sine component. Error bars indicate the standard error.

### **BOX 1: Installation guide for MyROOT software**

1. Execute MyAppInstaller\_mcr.exe.
2. In the Root Analysis Installer window press the *Next* button.
3. In the Installation Options window select the folder where you wish to install the software. By default, the selected folder is C:\Program Files\La Salle – Universidad Ramon Llull\Root\_Analysis.
4. Mark the option *Add a shortcut to the desktop*.
5. Press the *Next* button.
6. In the Required Software window select the installation folder for the MATLAB Runtime (by default C:\Program Files\MATLAB\MATLAB Runtime)
7. Press the *Next* button.
8. In the License Agreement window mark the option *Yes*.
9. Press the *Next* button.
10. In the Confirmation window press the *Install* button.
11. Copy the HypocotylDetection folder to the Desktop (this folder is in the same folder as the .exe file used for the installation).
12. Open the software by pressing in the MyROOT Desktop icon.

## **BOX 2: Brief user guide for MyROOT software**

1. Open the software in a PC.
2. Select and load the image to process by pressing the *LOAD IMG* button. Enter an image resize factor between 0 and 1 in the Scale edit box to reduce the size of the image and speed up the processing of high-resolution images.
3. Obtain the pixels-to-millimeters scale factor by pressing the *Ruler ID* button. If needed, edit the Ruler Threshold value to modify the sensitivity of the ruler detector and repeat step 3.
4. Start the root segmentation process by pressing the *Root Mask* button. Select the area where the roots are present by clicking in the image. Double click in one of the vertex to start generating the mask. In case the result is not satisfactory (e.g., over-segmented roots), modify the sensitivity factor in the Root Threshold edit box and repeat step 4.
5. Enter a value in the Root Length Threshold box to indicate the minimum percentage with respect to the longest root to be measured.
6. Start the root tracking and measurement process by pressing the *Root Detection* button.
7. Enter the path of the files containing the pre-trained hypocotyl detection models in the Hypocotyl Model Path edit box.
8. Optionally, to perform hypocotyl detection based on color descriptors only, check the *Only Color* checkbox, and to conduct a channel-wise color normalization process check the *Norm Color* checkbox.
9. Optionally, modify the threshold of the linSVM classifier by modifying the value in the edit box located next to the Hypocotyl Detection button.
10. Start the hypocotyl detection process by pressing the *Hypocotyl Detection* button.
11. If some of the hypocotyls were undetected, insert them manually by using the *Add* button. Press the *Enter* key and press the *Root Refinement* button to update root length measurements.
12. Remove the undesired roots from the measurement by typing the root identifier in the ID edit box and pressing the *Remove* button. Press the *Visualize* button to refresh the image presented on MyROOT's visualization canvas.
13. Enter the path where you would like the results to be stored in the Results Path edit box.
14. Choose the type of data you want to save by checking the corresponding checkboxes.
15. Optionally, type an identification suffix that will be appended to the stored file names via the Root Label edit box.
16. Save the results by pressing the *SAVE* button.
